# Supplementary material for: Histone Deacetylase Inhibitor Trichostatin A Reduces Endothelial Cell Proliferation by Suppressing STAT5A-Related Gene Transcription
Source: Front Oncol. 2021 Sep 23;11:746266. doi: 10.3389/fonc.2021.746266 (PMC8506210; doi:10.3389/fonc.2021.746266)
Supplement: Supplementary file 2 [file Table_1.xlsx]

## Sheet: Sheet1
qRT-PCR	Forward (5'-3')	Reverse (5'-3')
HDAC1	CTACTACGACGGGGATGTTGG	GAGTCATGCGGATTCGGTGAG
HDAC2	ATGGCGTACAGTCAAGGAGG	TGCGGATTCTATGAGGCTTCA
HDAC3	CCTGGCATTGACCCATAGCC	CTCTTGGTGAAGCCTTGCATA
HDAC4	GGCCCACCGGAATCTGAAC	GAACTCTGGTCAAGGGAACTG
HDAC5	TCTTGTCGAAGTCAAAGGAGC	GAGGGGAACTCTGGTCCAAAG
HDAC6	AAGAAGACCTAATCGTGGGACT	GCTGTGAACCAACATCAGCTC
HDAC7	GGCGGCCCTAGAAAGAACAG	CTTGGGCTTATAGCGCAGCTT
HDAC8	TCGCTGGTCCCGGTTTATATC	TACTGGCCCGTTTGGGGAT
HDAC9	AGTAGAGAGGCATCGCAGAGA	GGAGTGTCTTTCGTTGCTGAT
HDAC10	CAGTTCGACGCCATCTACTTC	CAAGCCCATTTTGCACAGCTC
BRIC5	AGGACCACCGCATCTCTACAT	AAGTCTGGCTCGTTCTCAGTG
CKS1B	TATTCGGACAAATACGACGACG	CGCCAAGATTCCTCCATTCAGA
NDC80	GCCTTCCGCGACATAGAGG	CCTGCTCCTTCGCATTGAGA
STAT5A	GCAGAGTCCGTGACAGAGG	CCACAGGTAGGGACAGAGTCT
GAPDH	GGAGCGAGATCCCTCCAAAAT	GGCTGTTGTCATACTTCTCATGG
Plasmid construction (5'-3')
BIRC5
Promoter(FL)	CCTCAGCCTCCTGAGTAGCTGGGAC	ACAAAGCCCATCGAGGCTGGCCAG
P-2146-+508	TGCCACTGCACTGCACTCCAGCCTGG	ACAAAGCCCATCGAGGCTGGCCAG
P-979-+508	ACCAGAGAAGTGAGTGGATGTGAT	ACAAAGCCCATCGAGGCTGGCCAG
P-37-+508	AATCGCGGGACCCGTTGGCAG	ACAAAGCCCATCGAGGCTGGCCAG
BIRC5-wt	CACAATCTCAGCTCACTGCACC	ACGCCCTCTTAGGCGGTCCACCC
BIRC5-mut	GCCTGCACGCGAAGAAACTTAG	CGACTGCTAAGTTTCTTCG
CKS1B
Promoter(FL)	CTTATGTCTAGGAAGGCCTAGAG	AGAAAGCCTCATGGGTGAGGG
P-1695--979	CTTATGTCTAGGAAGGCCTAGAG	ACCACGCCCCCTTAGGAGCTTTATC
CKS1B-wt	ACTTCTGGGCGGGGAGGCTTTC	GACTCACTCTTTCACCCCGGAA
CKS1B-mut	ATTCGAATCGAAGAAACTTGA	ACCCTGCTCAAGTTTCTTCG
NDC80
Promoter(FL)	CCACCTTCTGCTGTTATCATCAG	GATTTACATAGTATGAGCCTATG
P-1936-+746	CCGGCAAGTGATCAAATACTGAGCC	GATTTACATAGTATGAGCCTATG
P-983-+746	GCGTCTGAATACTAGTGTAGCT	GATTTACATAGTATGAGCCTATG
P-98-+746	GACTGTCTTTCTGTTTAAGGATA	GATTTACATAGTATGAGCCTATG
NDC80-wt	TTTAGCAGATGTGAAGGGAG	GCCTTCACAAGGGTATCCGTGGT
NDC80-mut	AGAATAATTCCAAAGAAACTTAC	CCTTTTCTTTGGTAAGTTTCTTTG
STAT5A ORF	ATGGCGGGCTGGATCCAGGCCCAGCAG	TCATGAGAGGGAGCCTCTGGCAGAGGTGAAAAG
siRNA
BIRC5	UUAUUGUUGGUUUCCUUUGCA	CAAAGGAAACCAACAAUAAGA
CKS1B	AUAGUAAAUUUGUUUGUGCGA	GCACAAACAAAUUUACUAUUC
NDC80	UAUACUCAACUUUCCAAAGGU	CUUUGGAAAGUUGAGUAUAAA
STAT5A	UUGAUCUUCAGUAAAAACCCA	GGUUUUUACUGAAGAUCAAGC
control	GCAAACAUCCCAGAGGUAU	AUACCUCUGGGAUGUUUGC
CHIP
BIRC5	TCAAAGTGTTGGGATTACAGG	GCACCCAGCGACGCCGCGCCAGCT
CKS1B	GGCGGAGCTTCAACAAATTC	CTACGAGAAACCCTTCGTTACTC
NDC80	AGGACAGAGCAGGAGAGATTG	ATTACCTCAAATTCTCTTAT
